# Supplementary material for: miR‐876 Inhibits EMT and Liver Fibrosis via POSTN to Suppress Metastasis in Hepatocellular Carcinoma
Source: Hindawi journal article supplement (doi:10.1155/2020/1964219), 2020-01-01
Supplement: f1 [file 1964219.f1.pdf]

Table S1 Sample IDs used in the study from TCGA database

| Group               | Sample ID       | Group | Sample ID       |
|---------------------|-----------------|-------|-----------------|
| Peritumoral samples | TCGA-BC-A10Q-11 | Tumor | TCGA-BC-A10Q-01 |
|                     | TCGA-BC-A10R-11 |       | TCGA-BC-A10R-01 |
|                     | TCGA-BC-A10T-11 |       | TCGA-BC-A10T-01 |
|                     | TCGA-BC-A10U-11 |       | TCGA-BC-A10U-01 |
|                     | TCGA-BC-A10W-11 |       | TCGA-BC-A10W-01 |
|                     | TCGA-BC-A10X-11 |       | TCGA-BC-A10X-01 |
|                     | TCGA-BC-A10Y-11 |       | TCGA-BC-A10Y-01 |
|                     | TCGA-BC-A10Z-11 |       | TCGA-BC-A10Z-01 |
|                     | TCGA-BC-A110-11 |       | TCGA-BC-A110-01 |
|                     | TCGA-BC-A216-11 |       | TCGA-BC-A216-01 |
|                     | TCGA-BD-A2L6-11 |       | TCGA-BD-A2L6-01 |
|                     | TCGA-BD-A3EP-11 |       | TCGA-BD-A3EP-01 |
|                     | TCGA-DD-A113-11 |       | TCGA-DD-A113-01 |
|                     | TCGA-DD-A114-11 |       | TCGA-DD-A114-01 |
|                     | TCGA-DD-A116-11 |       | TCGA-DD-A116-01 |
|                     | TCGA-DD-A118-11 |       | TCGA-DD-A118-01 |
|                     | TCGA-DD-A119-11 |       | TCGA-DD-A119-01 |
|                     | TCGA-DD-A11A-11 |       | TCGA-DD-A11A-01 |
|                     | TCGA-DD-A11B-11 |       | TCGA-DD-A11B-01 |
|                     | TCGA-DD-A11C-11 |       | TCGA-DD-A11C-01 |
|                     | TCGA-DD-A11D-11 |       | TCGA-DD-A11D-01 |
|                     | TCGA-DD-A1EB-11 |       | TCGA-DD-A1EB-01 |
|                     | TCGA-DD-A1EC-11 |       | TCGA-DD-A1EC-01 |
|                     | TCGA-DD-A1EE-11 |       | TCGA-DD-A1EE-01 |
|                     | TCGA-DD-A1EG-11 |       | TCGA-DD-A1EG-01 |
|                     | TCGA-DD-A1EH-11 |       | TCGA-DD-A1EH-01 |
|                     | TCGA-DD-A1EI-11 |       | TCGA-DD-A1EI-01 |
|                     | TCGA-DD-A1EJ-11 |       | TCGA-DD-A1EJ-01 |
|                     | TCGA-DD-A1EL-11 |       | TCGA-DD-A1EL-01 |
|                     | TCGA-DD-A39V-11 |       | TCGA-DD-A39V-01 |
|                     | TCGA-DD-A39W-11 |       | TCGA-DD-A39W-01 |
|                     | TCGA-DD-A39X-11 |       | TCGA-DD-A39X-01 |
|                     | TCGA-DD-A39Z-11 |       | TCGA-DD-A39Z-01 |
|                     | TCGA-DD-A3A1-11 |       | TCGA-DD-A3A1-01 |
|                     | TCGA-DD-A3A2-11 |       | TCGA-DD-A3A2-01 |
|                     | TCGA-DD-A3A3-11 |       | TCGA-DD-A3A3-01 |
|                     | TCGA-DD-A3A4-11 |       | TCGA-DD-A3A4-01 |
|                     | TCGA-DD-A3A5-11 |       | TCGA-DD-A3A5-01 |
|                     | TCGA-DD-A3A6-11 |       | TCGA-DD-A3A6-01 |
|                     | TCGA-DD-A3A8-11 |       | TCGA-DD-A3A8-01 |
| TCGA-EP-A12J-11     | TCGA-EP-A12J-01 |       |                 |
| TCGA-EP-A26S-11     | TCGA-EP-A26S-01 |       |                 |

---

TCGA-EP-A3RK-11  
TCGA-ES-A2HT-11  
TCGA-FV-A23B-11  
TCGA-FV-A2QR-11  
TCGA-FV-A3I0-11  
TCGA-FV-A3I1-11  
TCGA-G3-A3CH-11

TCGA-EP-A3RK-01  
TCGA-ES-A2HT-01  
TCGA-FV-A23B-01  
TCGA-FV-A2QR-01  
TCGA-FV-A3I0-01  
TCGA-FV-A3I1-01  
TCGA-G3-A3CH-01

---

Table S2. Primers sequences used in this study

| Gene              | Primer    | Sequence                                                       |
|-------------------|-----------|----------------------------------------------------------------|
| U6                | Forward   | CTCGCTTCGGCAGCACA                                              |
|                   | Backward  | AACGCTTCACGAATTTGCGT                                           |
| miR-876-5P        | Forward   | GGGGTGGATTCTTTGTGAATC                                          |
| miR-490-3P        | Forward   | CAACCTGGAGGACTCCATG                                            |
| POSTN             | Forward   | GCGAGATCATCAAGCCAGCAGAG                                        |
|                   | Backward  | ATGTCCAGTCTCCAGGTTGTGTCA                                       |
| shPOSTN           | Sequence  | CCGGCGGTGACAGTATAACAGTAAACTC<br>GAGTTTACTGTTATACTGTCACCGTTTTTG |
| beta-actin        | Forward   | GCGGACTATGACTTAGTTGCGTTACA                                     |
|                   | Backward  | TGCTGTCACCTTCACCGTTCCA                                         |
| miR-876 mimics    | sense     | UGGAUUUCUUUGUGAAUCACCA                                         |
|                   | antisense | GUGAUUCACAAAGAAAUCCA                                           |
| mimic control     | sense     | UUCUCCGAACGUGUCACGUTT                                          |
|                   | antisense | ACGUGACACGUUCGGAGA                                             |
| miR-876 inhibitor | Sequence  | UGGUGAUUCACA AAGAAAUCCA                                        |
| Inhibitor NC      | Sequence  | CAGUACUUUUGUGUAGUACAA                                          |
